# Supplementary material for: A Cyclic Metabolic Network in Pseudomonas protegens Pf-5 Prioritizes the Entner-Doudoroff Pathway and Exhibits Substrate Hierarchy during Carbohydrate Co-Utilization
Source: PubMed Central journal article supplement (PMC6293094; doi:10.1128/aem.02084-18), 2018-12-13
Supplement: AEM.02084-18-s0001.pdf [file AEM.02084-18-s0001.pdf]

Journal: *Applied and Environmental Microbiology*  
Section: Physiology

## **A Cyclic Metabolic Network in *Pseudomonas protegens* Pf-5 Prioritizes the Entner-Doudoroff Pathway and Exhibits Substrate Hierarchy during Carbohydrate Co-Utilization**

**Authors:** Rebecca A. Wilkes<sup>a</sup>, Caroll M. Mendonca<sup>a</sup>, and Ludmilla Aristilde<sup>a,#</sup>

**Affiliation:** <sup>a</sup>Department of Biological and Environmental Engineering, College of Agriculture and Life Sciences, Cornell University, Ithaca, NY 14853, USA

#Corresponding author:

214 Riley-Robb Hall, Cornell University, Ithaca, NY 14850

Phone: (607) 255-6845. Fax: (607) 255-4449. E-mail: ludmilla@cornell.edu

### SUPPLEMENTARY INFORMATION

Table S1

Fig. S1

Table S2

Fig. S2

Table S3

Table S4

Fig. S3

Fig. S4

Fig. S5

Fig. S6

Fig. S7

Table S5

Table S6

Fig. S8

Fig. S9

Fig. S10

Fig. S11

Table S1. List of the corresponding gene loci and gene annotations to the reactions and genes shown in Fig. 1 in the main text. NF indicates gene name was not found..

| Reactions                                                 | Gene                          | Gene locus                                      | Annotation                                                                                                                                                                  |
|-----------------------------------------------------------|-------------------------------|-------------------------------------------------|-----------------------------------------------------------------------------------------------------------------------------------------------------------------------------|
| Gluc <sub>ext</sub> -> Gluc <sub>peri</sub>               | <i>oprB</i>                   | PFL_3366                                        | carbohydrate-selective porin                                                                                                                                                |
| FruC <sub>ext</sub> -> F1P                                | <i>FruA; FruB</i>             | PFL_0861;<br>PFL_0859                           | PTS system, fructose-specific IIBC component; putative multiphosphoryl transfer protein                                                                                     |
| F1P -> FBP                                                | <i>FruK</i>                   | PFL_0860                                        | 1-phosphofructokinase                                                                                                                                                       |
| Mann <sub>ext</sub> -> M6P                                | <i>FruA; nagE; treP</i>       | PFL_0861;<br>PFL_1078;<br>PFL_4934              | PTS system, fructose-specific IIBC component; PTS system, N-acetylglucosamine-specific IIBC component; PTS system trehalose-specific IIBC component                         |
| M6P -> F6P                                                | <i>pslB; algA</i>             | PFL_4209;<br>PFL_1013;<br>PFL_5483              | mannose-1-phosphate guanylyltransferase/mannose-6-phosphate isomerase; alginate biosynthesis protein; mannose-1-phosphate guanylyltransferase/mannose-6-phosphate isomerase |
| Gluc <sub>peri</sub> -> G6P                               | <i>glk</i>                    | PFL_4621                                        | glucokinase                                                                                                                                                                 |
| Gluc <sub>peri</sub> -> Glucn <sub>peri</sub>             | <i>gcd</i>                    | PFL_4916                                        | quinoprotein glucose dehydrogenase                                                                                                                                          |
| Glucn <sub>peri</sub> -> 6P-Glucn                         | <i>gntT; gntK</i>             | PFL_4579;<br>PFL_4580                           | high-affinity gluconate transporter; gluconokinase                                                                                                                          |
| Glucn <sub>peri</sub> -> 2-ketoglucn <sub>peri</sub>      | NF                            | PFL_0053;<br>PFL_0054;<br>PFL_0055              | gluconate 2-dehydrogenase subunit 3; gluconate 2-dehydrogenase flavoprotein; gluconate 2-dehydrogenase cytochrome c subunit                                                 |
| 2-ketoglucn <sub>peri</sub> -> 2-Ketoglucn <sub>cyt</sub> | NF                            | PFL_2718                                        | MFS transporter, anion:cation symporter (ACS) family                                                                                                                        |
| 2-ketoglucn -> 2-ketoglucnP                               | <i>kdgK_1</i>                 | PFL_2719                                        | 2-dehydro-3-deoxygluconokinase                                                                                                                                              |
| 2-ketoglucn <sub>p</sub> -> 6P-Glucn                      | <i>ghrB1</i>                  | PFL_2717                                        | glyoxylate/hydroxypyruvate reductase B                                                                                                                                      |
| G6P -> 6P-Glucn                                           | <i>zwf; pgl</i>               | PFL_3143;<br>PFL_4609                           | glucose-6-phosphate dehydrogenase; 6-phosphogluconolactonase                                                                                                                |
| DHAP -> GAP                                               | <i>tpiA</i>                   | PFL_0839                                        | triose-phosphate isomerase                                                                                                                                                  |
| FBP -> DHAP + GAP                                         | <i>fba</i>                    | PFL_5781                                        | fructose-bisphosphate aldolase, class II                                                                                                                                    |
| FBP -> F6P                                                | <i>fbp</i>                    | PFL_0393                                        | fructose-1,6-bisphosphatase                                                                                                                                                 |
| F6P -> G6P                                                | <i>pgi</i>                    | PFL_5280                                        | glucose-6-phosphate isomerase                                                                                                                                               |
| Xyl <sub>peri</sub> -> Xyl <sub>cyt</sub>                 | <i>rbsA; rbsB; rbsC; rbsD</i> | PFL_2102;<br>PFL_2101;<br>PFL_2103;<br>PFL_2106 | ribose ABC transporter, ATP-binding protein; ribose ABC transporter, periplasmic; ribose ABC transporter, permease protein; D-ribose pyranase                               |

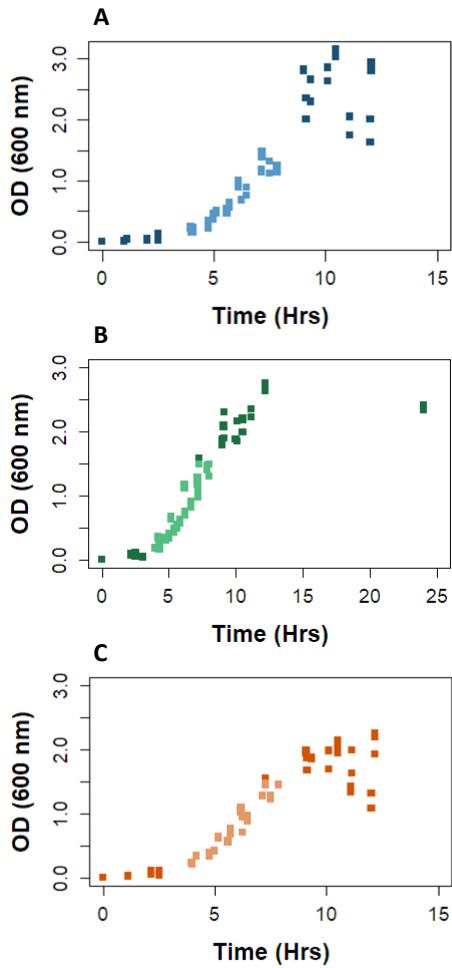

Fig. S1. Growth curves when grown on 100 mM total carbon of A) glucose alone (blue), B) glucose in 50:50 ratio with fructose (green), or C) mannose (orange). Lighter color indicates exponential points taken for growth rate calculations. Data were from seven independent biological replicates.

Table S2. Growth parameters<sup>a</sup> of *P. protegens* Pf-5.

| Condition <sup>b</sup> | Growth Rate (hr <sup>-1</sup> ) | Uptake Rate (mmol gCDW <sup>-1</sup> hr <sup>-1</sup> )         | Y <sub>x/s</sub> (g/g) | Maximum concentration (mM) |                 |               |
|------------------------|---------------------------------|-----------------------------------------------------------------|------------------------|----------------------------|-----------------|---------------|
|                        |                                 |                                                                 |                        | Gluconate                  | 2-Ketogluconate | Pyruvate      |
| Glucose                | 0.56 ± 0.09                     | 13.35 ± 3.28 <sup>c</sup><br>(10.95 ± 2.24) <sup>d</sup>        | 0.39 ± 0.03            | 3.71 ± 0.16                | 2.34 ± 0.73     | 0.13 ± 0.08   |
| Glucose:Fructose       | 0.52 ± 0.06                     | Glucose: 7.01 ± 1.70 <sup>c</sup><br>(4.11 ± 1.69) <sup>d</sup> | 0.42 ± 0.11            | 3.33 ± 0.39                | 2.73 ± 0.68     | 0.028 ± 0.027 |
|                        |                                 | Fructose: 2.02 ± 0.86                                           |                        |                            |                 |               |
| Glucose:Mannose        | 0.50 ± 0.04                     | Glucose: 7.21 ± 2.74 <sup>c</sup><br>(5.70 ± 2.13) <sup>d</sup> | 0.40 ± 0.11            | 2.16 ± 0.47                | 0.36 ± 0.14     | 0.077 ± 0.019 |
|                        |                                 | Mannose: 1.91 ± 1.11                                            |                        |                            |                 |               |

<sup>a</sup>The values in the table represent means ± standard deviation. Data were calculated from three independent biological replicate ( $n = 3$ ), except for growth rate where  $n = 7$ .

<sup>b</sup>The total carbon-equivalent concentration of the growth substrates was 100 mM C (or 3 g L<sup>-1</sup>).

<sup>c</sup>Uptake rate of glucose into the periplasm

<sup>d</sup>Uptake rate modified to account for secretions of gluconate and 2-ketogluconate.

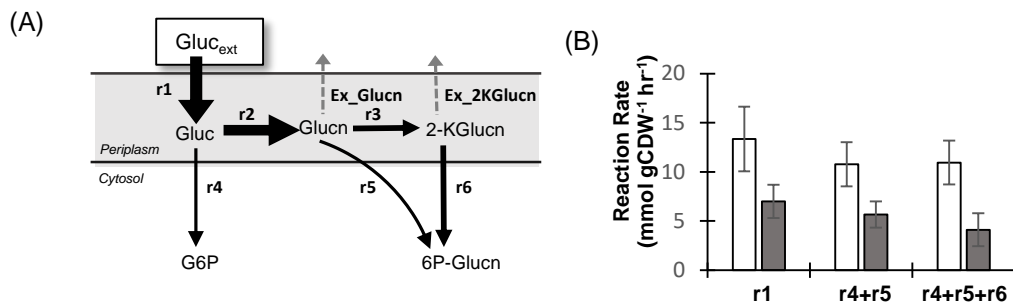

Fig. S2. Constraints in the MFA to account for secretions of gluconate and 2-ketogluconate from the periplasm. (A) Schematic of periplasmic reactions and (B) calculated rates comparing during growth on glucose only (white bars) or on equimolar glucose and fructose (gray bars). Error bars represent 95% confidence intervals. Data were obtained from three independent biological replicates.

Table S3. Intracellular metabolic rates determined from quantitative flux modeling of the metabolism of [1,2-<sup>13</sup>C<sub>2</sub>]-glucose in *P. protegens* Pf-5 using the 13CFLUX2 software. These metabolic fluxes are illustrated in Fig. 4 in the main text. Refer to the legends of Fig. 1 and Fig. 3 in the main text for the abbreviations of the metabolite names.

| Reactions                                            | [1,2- <sup>13</sup> C <sub>2</sub> ]-glucose<br><i>mmol gCDW<sup>-1</sup> h<sup>-1</sup></i> |
|------------------------------------------------------|----------------------------------------------------------------------------------------------|
| Gluc <sub>ext</sub> -> Gluc <sub>peri</sub>          | 13.35 ± 3.28                                                                                 |
| Gluc <sub>peri</sub> -> G6P                          | 0.64 ± 0.45                                                                                  |
| Gluc <sub>peri</sub> -> Glucn <sub>peri</sub>        | 12.71 ± 0.45                                                                                 |
| Glucn <sub>peri</sub> -> 6P-Glucn                    | 7.69 ± 0.68                                                                                  |
| Glucn <sub>peri</sub> -> 2-ketoglucn <sub>peri</sub> | 1.70 ± 0.86                                                                                  |
| 2-ketoglucn <sub>peri</sub> -> 6P-Glucn              | 0.16 ± 0.14                                                                                  |
| G6P -> 6P-Glucn                                      | 1.19 ± 0.58                                                                                  |
| 6P-Glucn -> Pyr + GAP                                | 8.97 ± 0.08                                                                                  |
| GAP -> 3-PG                                          | 6.21 ± 0.72                                                                                  |
| 3-PG -> PEP                                          | 5.40 ± 0.76                                                                                  |
| PEP -> Pyr                                           | 3.59 ± 0.47                                                                                  |
| Pyr -> AcCoA + CO <sub>2</sub>                       | 10.03 ± 0.95                                                                                 |
| DHAP -> GAP                                          | -1.22 ± 0.30                                                                                 |
| FBP -> DHAP + GAP                                    | -1.16 ± 0.29                                                                                 |
| FBP -> F6P                                           | 1.16 ± 0.29                                                                                  |
| F6P -> G6P                                           | 0.63 ± 0.20                                                                                  |
| 6P-Glucn -> Ru5P                                     | 0.06 ± 0.11                                                                                  |
| Ru5P-> R5P                                           | 0.59 ± 0.02                                                                                  |
| Ru5P -> Xu5P                                         | -0.53 ± 0.09                                                                                 |
| Xu5P + R5P -> GAP + S7P                              | -0.15 ± 0.04                                                                                 |
| S7P + GAP -> E4P + F6P                               | -0.15 ± 0.04                                                                                 |
| E4P + Xu5P -> F6P + GAP                              | -0.39 ± 0.05                                                                                 |
| OAA + AcCoA -> Cit                                   | 10.03 ± 0.95                                                                                 |
| Cit -> αKG                                           | 10.03 ± 0.95                                                                                 |
| αKG -> Succ                                          | 9.36 ± 0.97                                                                                  |
| Succ -> Fum                                          | 9.36 ± 0.97                                                                                  |
| Fum -> Mal                                           | 9.49 ± 0.97                                                                                  |
| Mal -> Pyr + CO <sub>2</sub>                         | 8.47 ± 0.55                                                                                  |
| Pyr + CO <sub>2</sub> -> OAA                         | 9.35 ± 0.44                                                                                  |
| PEP + CO <sub>2</sub> -> OAA                         | 1.27 ± 0.34                                                                                  |
| OAA -> IMP + Fum                                     | 0.13 ± 0.001                                                                                 |

Table S4. Biomass and excretion efflux rates determined from quantitative flux modeling of the metabolism of [1,2-<sup>13</sup>C<sub>2</sub>]-glucose in *P. protegens* Pf-5 using the 13CFLUX2 software. These metabolic fluxes are illustrated in Fig. 4 in the main text. Refer to the legends of Fig. 1 and Fig. 3 in the main text for the abbreviations of the metabolite names.

| Reactions                                               | [1,2- <sup>13</sup> C <sub>2</sub> ]-glucose<br><i>mmol gCDW<sup>-1</sup> h<sup>-1</sup></i> |
|---------------------------------------------------------|----------------------------------------------------------------------------------------------|
| aKG -> Biomass                                          | 0.67 ± 0.02                                                                                  |
| DHAP -> Biomass                                         | 0.06 ± 0.004                                                                                 |
| E4P -> Biomass                                          | 0.24 ± 0.02                                                                                  |
| G6P -> Biomass                                          | 0.08 ± 0.01                                                                                  |
| OAA -> Biomass                                          | 1.48 ± 0.03                                                                                  |
| PEP -> Biomass                                          | 0.54 ± 0.03                                                                                  |
| 3PG -> Biomass                                          | 0.81 ± 0.04                                                                                  |
| Pyruvate -> Biomass                                     | 1.65 ± 0.04                                                                                  |
| R5P -> Biomass                                          | 0.74 ± 0.02                                                                                  |
| Glucn <sub>in</sub> -> Glucn <sub>ext</sub>             | 3.33 ± 0.72                                                                                  |
| 2-ketoglucn <sub>in</sub> -> 2-ketoglucn <sub>ext</sub> | 1.54 ± 0.88                                                                                  |

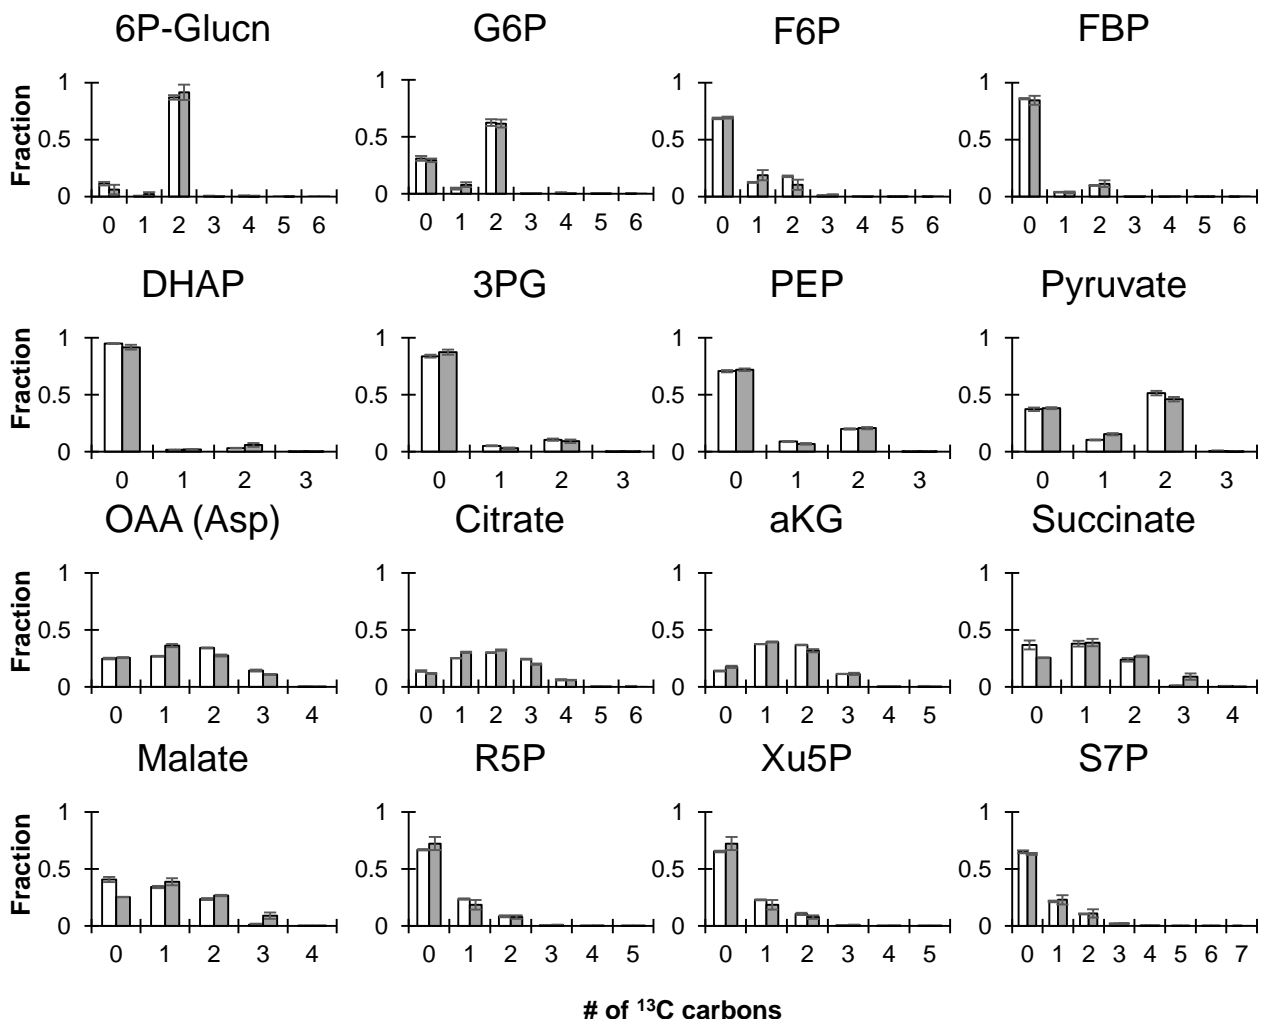

Fig. S3. Experimentally-determined (white bars) and model-estimated (gray bars) isotopomer distributions in the metabolite labeling patterns during *P. protegens* Pf-5 growth on [1,2- $^{13}\text{C}_2$ ]-glucose. Data (average  $\pm$  standard deviation) were from optimizations of experimental data obtained from three independent biological replicates averaged across two timepoints ( $\text{OD}_{600}$  of 0.5 and  $\text{OD}_{600}$  of 1).



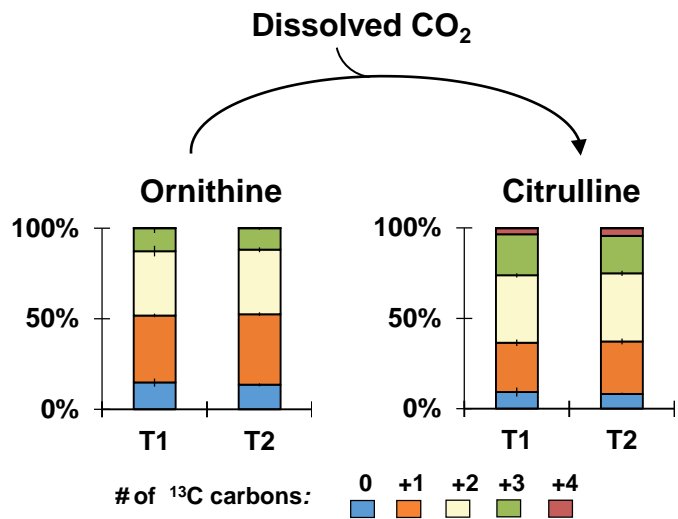

Fig. S4. Estimation of CO<sub>2</sub> labeling from the biosynthesis of citrulline from ornithine. Citrulline is formed from ornithine by the incorporation of dissolved CO<sub>2</sub>. Addition of <sup>13</sup>C-labeled carbons in citrulline is taken as addition of labeled dissolved CO<sub>2</sub>.

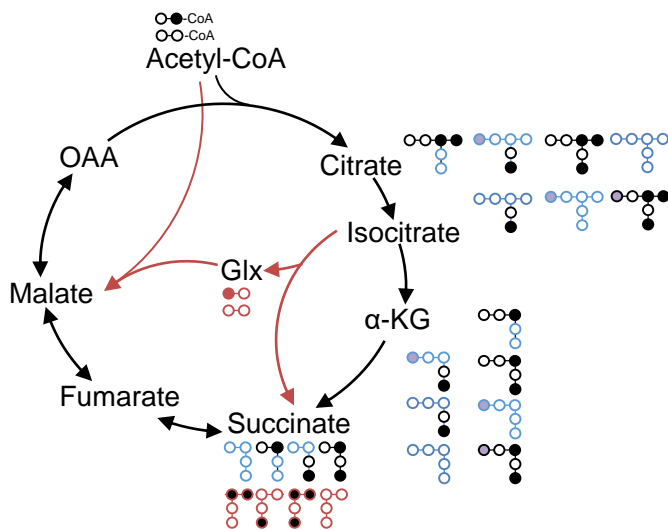

Fig. S5. Carbon mapping of metabolite labeling in the traditional TCA cycle and the glyoxylate shunt. Filled and empty and white circles indicate, respectively,  $^{13}\text{C}$ -labeled and non-labeled carbons. Red-lines represent metabolites generated from the glyoxylate shunt; purple-filled circles represent incorporation of labeled carbon dioxide ( $\text{CO}_2$ ) in solution. Oxaloacetate, OAA.

# of <sup>13</sup>C carbons: 0 +1 +2 +3 +4 +5 +6 +7

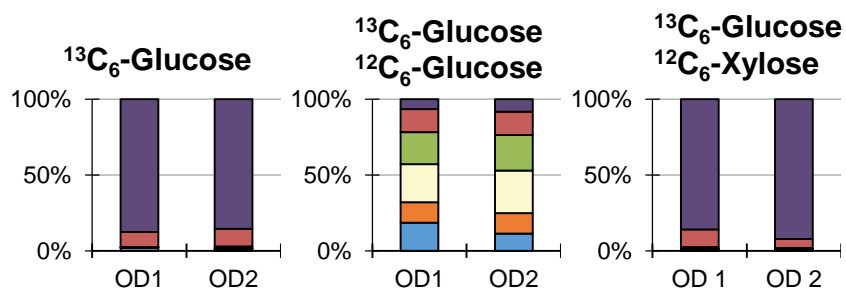

Fig. S6. Metabolite labeling pattern of  $\alpha$ -ketoglutarate during growth on [U-<sup>13</sup>C<sub>6</sub>]-glucose (<sup>13</sup>C<sub>6</sub>-Glucose) alone or with unlabeled glucose (<sup>12</sup>C<sub>6</sub>-Glucose) or unlabeled xylose (<sup>12</sup>C<sub>6</sub>-Xylose).

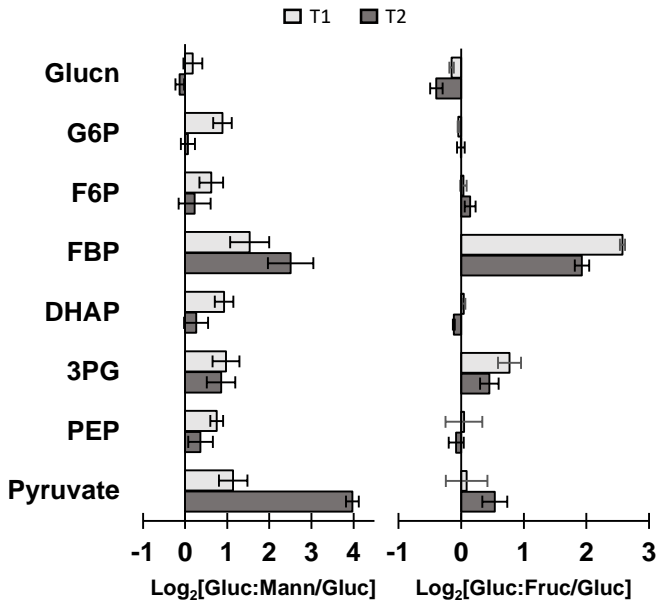

Fig. S7. Pool sizes of gluconate (Glucn) and metabolites in the EMP pathway. Data (average  $\pm$  standard deviation) were from three independent biological replicates.

Table S5. Intracellular metabolic rates determined from quantitative flux modeling of the metabolism of <sup>13</sup>C-labeled glucose (UGluc) with unlabeled glucose (Gluc) or fructose (Fruc) in *P. protegens* Pf-5 using the13CFLUX2 software. These metabolic fluxes are illustrated in Fig. 7 in the main text. Refer to the legends of Fig 1 and Fig. 3 in the main text for the abbreviations of the metabolite names.

| Reactions                                            | UGluc:Gluc<br><i>mmol gCDW<sup>-1</sup> h<sup>-1</sup></i> | UGluc:Fruc<br><i>mmol gCDW<sup>-1</sup> h<sup>-1</sup></i> |
|------------------------------------------------------|------------------------------------------------------------|------------------------------------------------------------|
| Gluc <sub>ext</sub> -> Gluc <sub>peri</sub>          | 13.35 ± 3.28                                               | 7.01 ± 1.70                                                |
| Fruc <sub>ext</sub> -> F1P                           | N/A                                                        | 1.29 ± 0.05                                                |
| F1P -> FBP                                           | N/A                                                        | 1.29 ± 0.05                                                |
| Gluc <sub>peri</sub> -> G6P                          | 1.19 ± 0.24                                                | 0.85 ± 0.14                                                |
| Gluc <sub>peri</sub> -> Glucn <sub>peri</sub>        | 12.16 ± 0.24                                               | 6.16 ± 0.14                                                |
| Glucn <sub>peri</sub> -> 6P-Glucn                    | 7.80 ± 0.35                                                | 3.79 ± 0.14                                                |
| Glucn <sub>peri</sub> -> 2-ketoglucn <sub>peri</sub> | 1.68 ± 0.71                                                | 1.17 ± 0.16                                                |
| 2-ketoglucn <sub>peri</sub> -> 6P-Glucn              | 1.02 ± 0.45                                                | 0.69 ± 0.14                                                |
| G6P -> 6P-Glucn                                      | 1.97 ± 0.12                                                | 2.39 ± 0.21                                                |
| 6P-Glucn -> Pyr + GAP                                | 10.71 ± 0.63                                               | 6.68 ± 0.24                                                |
| GAP -> 3-PG                                          | 7.86 ± 0.77                                                | 4.84 ± 0.14                                                |
| 3-PG -> PEP                                          | 7.19 ± 0.76                                                | 4.11 ± 0.14                                                |
| PEP -> Pyr                                           | 6.75 ± 0.76                                                | 3.63 ± 0.14                                                |
| DHAP -> GAP                                          | -1.30 ± 0.13                                               | -0.79 ± 0.05                                               |
| FBP -> DHAP + GAP                                    | -1.25 ± 0.13                                               | -0.73 ± 0.05                                               |
| FBP -> F6P                                           | 1.25 ± 0.13                                                | 2.03 ± 0.11                                                |
| F6P -> G6P                                           | 0.85 ± 0.13                                                | 1.61 ± 0.13                                                |
| 6P-Glucn -> Ru5P                                     | 0.08 ± 0.02                                                | 0.18 ± 0.10                                                |
| Ru5P -> R5P                                          | 0.48 ± 0.04                                                | 0.60 ± 0.03                                                |
| Ru5P -> Xu5P                                         | -0.40 ± 0.03                                               | -0.42 ± 0.04                                               |
| Xu5P + R5P -> GAP + S7P                              | -0.10 ± 0.02                                               | -0.10 ± 0.03                                               |
| S7P + GAP -> E4P + F6P                               | -0.10 ± 0.02                                               | -0.10 ± 0.03                                               |
| E4P + Xu5P -> F6P + GAP                              | -0.30 ± 0.01                                               | -0.32 ± 0.01                                               |

Table S6. Biomass and excretion efflux rates of metabolites determined from quantitative flux modeling of the metabolism of <sup>13</sup>C-labeled glucose (UGluc) with unlabeled glucose (Gluc) or fructose (Fruc) by *P. protegens* Pf-5 using the13CFLUX2 software. These metabolic fluxes are illustrated in Fig. 7 in the main text. Refer to the legends of Fig 1 and Fig. 3 in the main text for the abbreviations of the metabolite names.

| Reactions                                             | UGluc:Gluc                                   | UGluc:Fruc    |
|-------------------------------------------------------|----------------------------------------------|---------------|
|                                                       | <i>mmol gCDW<sup>-1</sup> h<sup>-1</sup></i> |               |
| DHAP -> Biomass                                       | 0.051 ± 0.001                                | 0.057 ± 0.001 |
| E4P -> Biomass                                        | 0.21 ± 0.01                                  | 0.23 ± 0.01   |
| G6P -> Biomass                                        | 0.064 ± 0.000                                | 0.071 ± 0.001 |
| PEP -> Biomass                                        | 0.441 ± 0.001                                | 0.49 ± 0.003  |
| 3PG -> Biomass                                        | 0.67 ± 0.01                                  | 0.74 ± 0.01   |
| Pyruvate -> Biomass                                   | 1.37 ± 0.08                                  | 1.48 ± 0.04   |
| R5P -> Biomass                                        | 0.57 ± 0.06                                  | 0.65 ± 0.04   |
| Gluc <sub>in</sub> -> Gluc <sub>ext</sub>             | 2.69 ± 0.92                                  | 1.46 ± 0.12   |
| 2-ketogluc <sub>in</sub> -> 2-ketogluc <sub>ext</sub> | 0.66 ± 0.26                                  | 0.37 ± 0.03   |

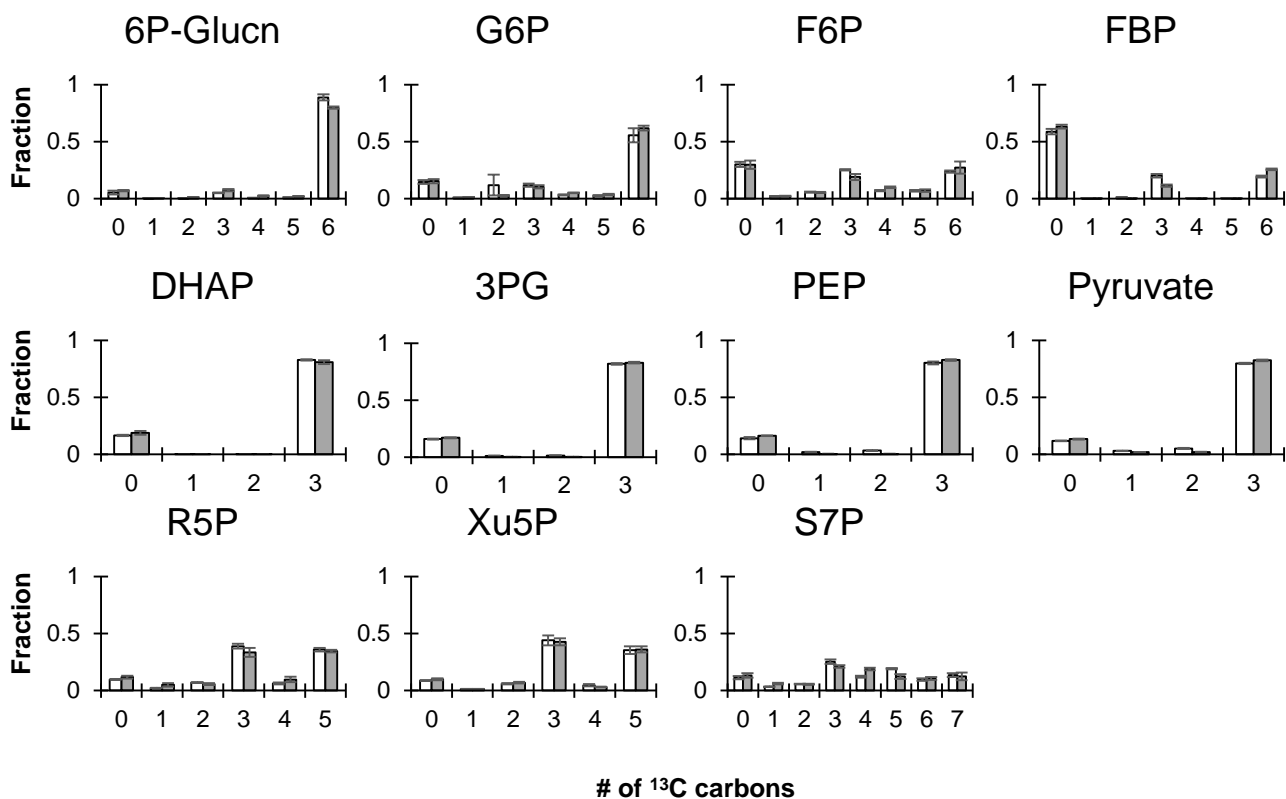

Fig. S8. Experimentally-determined (white bars) and model-estimated (gray bars) isotopomer distributions in the metabolite labeling patterns during *P. protegens* Pf-5 growth on 50:50  $[\text{U}^{13}\text{C}_6]$ -glucose and unlabeled fructose. Data (average  $\pm$  standard deviation) were from optimizations of experimental data obtained from three independent biological replicates ( $\text{OD}_{600}$  of 0.5-0.6).

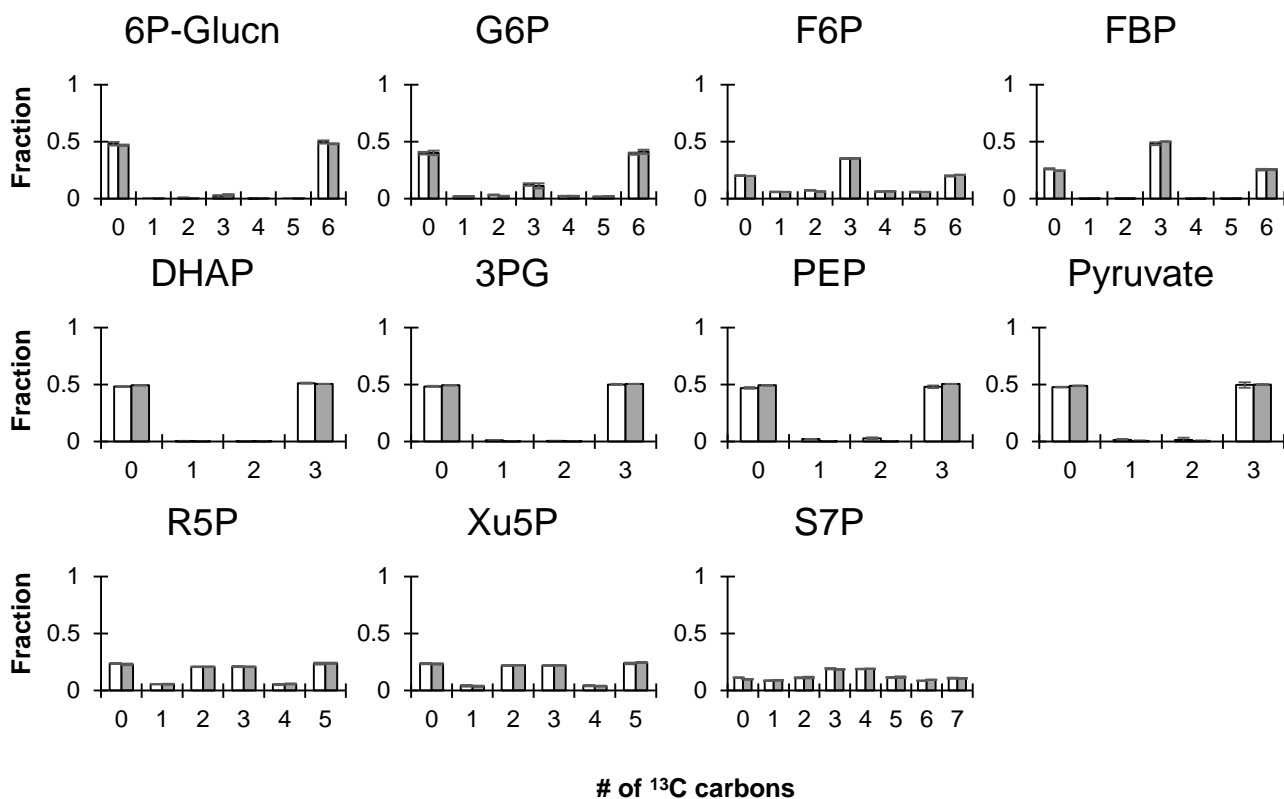

Fig. S9. Experimentally-determined (white bars) and model-estimated (gray bars) of isotopomer distributions in the carbon labeling patterns of *P. protegens* Pf-5 grown on 50:50 [U $^{13}\text{C}_6$ ]-glucose and unlabeled glucose. Data presented were the average of three independent optimizations of experimental data of three separate bioreplicates (OD $_{600}$  of 0.5-0.6). Error bars represent standard deviation.



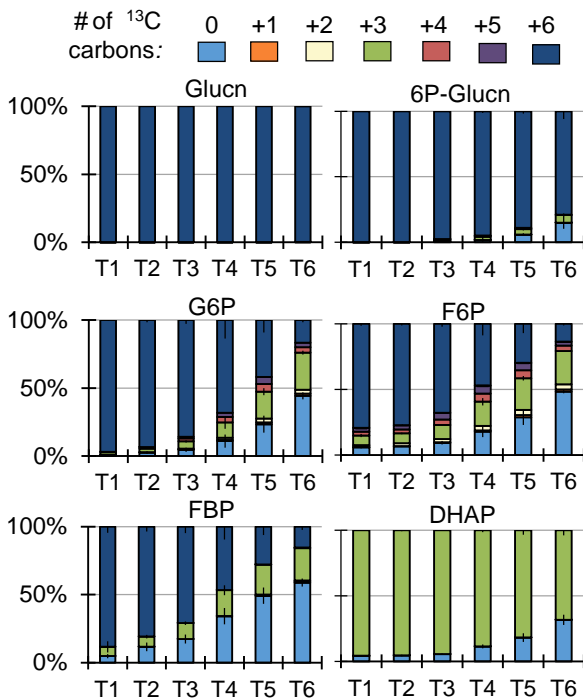

Fig. S10. Kinetic profiling of metabolite labeling patterns in cells grown simultaneously on [U-<sup>13</sup>C<sub>6</sub>]-glucose and unlabeled mannose. Color legend: nonlabeled carbon (light blue), one <sup>13</sup>C-carbon (orange), two <sup>13</sup>C-carbons (cream), three <sup>13</sup>C-carbons (green), four <sup>13</sup>C-carbons (red), five <sup>13</sup>C-carbons (purple), six <sup>13</sup>C-carbons (dark blue). Data were obtained at six timepoints during exponential growth: at OD<sub>600</sub> of 0.21-0.27 (T1), at OD<sub>600</sub> of 0.40-.44 (T2), at OD<sub>600</sub> of 0.54-0.67 (T3), at OD<sub>600</sub> of 0.79-.87 (T4), at OD<sub>600</sub> of 0.90-0.98 (T5), and at OD<sub>600</sub> of 1.2-1.4 (T6). The data (average ± standard deviation) were from three independent biological replicates.

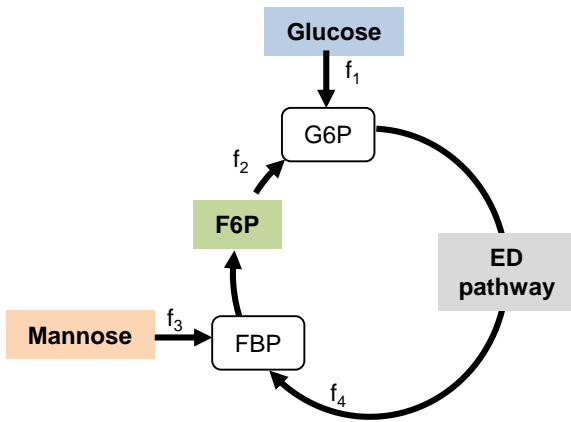

### Equations for flux into G6P

$$G6P(0,3,6) = f_1(\text{Glucose}(0,3,6)) + f_2(\text{F6P}(0,3,6))$$

$$f_1 = \frac{G6P(0,3,6) - F6P(0,3,6)}{\text{Glucose}(0,3,6) - F6P(0,3,6)}$$

### Equations for flux into FBP

$$FBP(0,6) = f_3(\text{Mannose}(0,6)) + f_4(\text{DHAP}(0,3))^2$$

$$f_3 = \frac{FBP(0,6) - \text{DHAP}(0,3)^2}{\text{Mannose}(0,6) - \text{DHAP}(0,3)^2}$$

Fig. S11. Network schematic and equations used for metabolic flux ratio analysis of the fractional flux into G6P from glucose ( $f_1$ ) and F6P ( $f_2$ ) or the fractional flux into FBP from mannose ( $f_3$ ) and ED pathway ( $f_4$ ).
